# Supplementary material for: Sparus aurata and Lates calcarifer skin microbiota under healthy and diseased conditions in UV and non-UV treated water
Source: Anim Microbiome. 2022 Jun 21;4:42. doi: 10.1186/s42523-022-00191-y (PMC9210813; doi:10.1186/s42523-022-00191-y)
Supplement: Supplementary file 4 — Additional file 4. Samples metadata file. [file 42523_2022_191_MOESM4_ESM.xlsx]

## Sheet: sampledata2016
Sample_ID	R1_fastq	R2_fastq	Description	Time	Source	Date	Tag	Fish	Tank	Status	Fate	Lane	replicate	Exp	seq_numb_raw	seq_numb
S87_23T0FB_S87	S87_23T0FB_S87_L001_R1_001.fastq	S87_23T0FB_S87_L001_R2_001.fastq	23T0FB	T0	Abdomen	2016-11-01	72D3421	Sparus_aurata	not_UV	Died_d4	Died	L16	R	1st	120593	120560
S40_BT173577D5_S40	S40_BT173577D5_S40_L001_R1_001.fastq	S40_BT173577D5_S40_L001_R2_001.fastq	BT173577D5	T1	Abdomen	14/01/2016	73577D5	Sparus_aurata	UV	Died_d4	Died	L16	R	1st	90182	90037
S15_23T0FB_S15	S15_23T0FB_S15_L001_R1_001.fastq	S15_23T0FB_S15_L001_R2_001.fastq	23T0FB	T0	Abdomen	2016-11-01	72D3421	Sparus_aurata	not_UV	Died_d4	Died	L08	R1	1st	15403	15065
S92_BT173577D5R2_S92	S92_BT173577D5R2_S92_L001_R1_001.fastq	S92_BT173577D5R2_S92_L001_R2_001.fastq	BT173577D5	T1	Abdomen	14/01/2016	73577D5	Sparus_aurata	UV	Died_d4	Died	L16	R1	1st	6435	6435
S20_26T0FB_S20	S20_26T0FB_S20_L001_R1_001.fastq	S20_26T0FB_S20_L001_R2_001.fastq	26T0FB	T0	Abdomen	2016-11-01	72DD897	Sparus_aurata	not_UV	Died_d4	Died	L08		1st	5549	5359
S25_28T0FB_S25	S25_28T0FB_S25_L001_R1_001.fastq	S25_28T0FB_S25_L001_R2_001.fastq	28T0FB	T0	Abdomen	2016-11-01	72D1B81	Sparus_aurata	not_UV	Survived	Survived	L08		1st	7830	7765
S30_35T0FB_S30	S30_35T0FB_S30_L001_R1_001.fastq	S30_35T0FB_S30_L001_R2_001.fastq	35T0FB	T0	Abdomen	2016-11-01	72DB0D6	Sparus_aurata	not_UV	Died_d4	Died	L08		1st	24360	24292
S35_20T0FB_S35	S35_20T0FB_S35_L001_R1_001.fastq	S35_20T0FB_S35_L001_R2_001.fastq	20T0FB	T0	Abdomen	2016-11-01	72D4610	Sparus_aurata	not_UV	Died_d3	Died	L08		1st	4286	4286
S4_31T0FB_S4	S4_31T0FB_S4_L001_R1_001.fastq	S4_31T0FB_S4_L001_R2_001.fastq	31T0FB	T0	Abdomen	2016-11-01	72DBD13	Sparus_aurata	not_UV	Survived	Survived	L08		1st	2370	2359
S41_31T1FB_S41	S41_31T1FB_S41_L001_R1_001.fastq	S41_31T1FB_S41_L001_R2_001.fastq	31T1FB	T1	Abdomen	14/01/2016	72DBD13	Sparus_aurata	not_UV	Survived	Survived	L08		1st	16767	16434
S46_33T1FB_S46	S46_33T1FB_S46_L001_R1_001.fastq	S46_33T1FB_S46_L001_R2_001.fastq	33T1FB	T1	Abdomen	14/01/2016	72DBF75	Sparus_aurata	not_UV	Died_d4	Died	L08		1st	12867	12807
S51_23T1FB_S51	S51_23T1FB_S51_L001_R1_001.fastq	S51_23T1FB_S51_L001_R2_001.fastq	23T1FB	T1	Abdomen	14/01/2016	72D3421	Sparus_aurata	not_UV	Died_d4	Died	L08		1st	4128	4125
S56_26T1FB_S56	S56_26T1FB_S56_L001_R1_001.fastq	S56_26T1FB_S56_L001_R2_001.fastq	26T1FB	T1	Abdomen	14/01/2016	72DD897	Sparus_aurata	not_UV	Died_d4	Died	L08		1st	47133	46973
S61_28T1FB_S61	S61_28T1FB_S61_L001_R1_001.fastq	S61_28T1FB_S61_L001_R2_001.fastq	28T1FB	T1	Abdomen	14/01/2016	72D1B81	Sparus_aurata	not_UV	Survived	Survived	L08		1st	26327	26163
S66_35T1FB_S66	S66_35T1FB_S66_L001_R1_001.fastq	S66_35T1FB_S66_L001_R2_001.fastq	35T1FB	T1	Abdomen	14/01/2016	72DB0D6	Sparus_aurata	not_UV	Died_d4	Died	L08		1st	1235	1213
S71_20T1FB_S71	S71_20T1FB_S71_L001_R1_001.fastq	S71_20T1FB_S71_L001_R2_001.fastq	20T1FB	T1	Abdomen	14/01/2016	72D4610	Sparus_aurata	not_UV	Died_d3	Died	L08		1st	87729	87218
S78_31T2FB_S78	S78_31T2FB_S78_L001_R1_001.fastq	S78_31T2FB_S78_L001_R2_001.fastq	31T2FB	T2	Abdomen	18/01/2016	72DBD13	Sparus_aurata	not_UV	Survived	Survived	L08		1st	105161	104761
S78_36T0FB_S78	S78_36T0FB_S78_L001_R1_001.fastq	S78_36T0FB_S78_L001_R2_001.fastq	36T0FB	T0	Abdomen	2016-11-01	72D3700	Sparus_aurata	not_UV	Died_d4	Died	L16		1st	29105	28317
S83_28T2FB_S83	S83_28T2FB_S83_L001_R1_001.fastq	S83_28T2FB_S83_L001_R2_001.fastq	28T2FB	T2	Abdomen	18/01/2016	72D1B81	Sparus_aurata	not_UV	Survived	Survived	L08		1st	4082	3859
S83_36T1FB_S83	S83_36T1FB_S83_L001_R1_001.fastq	S83_36T1FB_S83_L001_R2_001.fastq	36T1FB	T1	Abdomen	14/01/2016	72D3700	Sparus_aurata	not_UV	Died_d4	Died	L16		1st	12749	12749
S89_31T3FB_S89	S89_31T3FB_S89_L001_R1_001.fastq	S89_31T3FB_S89_L001_R2_001.fastq	31T3FB	T3	Abdomen	27/01/2016	72DBD13	Sparus_aurata	not_UV	Survived	Survived	L08		1st	1184	1137
S9_33T0FB_S9	S9_33T0FB_S9_L001_R1_001.fastq	S9_33T0FB_S9_L001_R2_001.fastq	33T0FB	T0	Abdomen	2016-11-01	72DBF75	Sparus_aurata	not_UV	Died_d4	Died	L08		1st	35405	35140
S94_28T3FB_S94	S94_28T3FB_S94_L001_R1_001.fastq	S94_28T3FB_S94_L001_R2_001.fastq	28T3FB	T3	Abdomen	27/01/2016	72D1B81	Sparus_aurata	not_UV	Survived	Survived	L08		1st	8296	8287
S03_BT073577D5_S03	S03_BT073577D5_S03_L001_R1_001.fastq	S03_BT073577D5_S03_L001_R2_001.fastq	BT073577D5	T0	Abdomen	2016-11-01	73577D5	Sparus_aurata	UV	Died_d4	Died	L16		1st	44597	44525
S08_BT073542E8_S08	S08_BT073542E8_S08_L001_R1_001.fastq	S08_BT073542E8_S08_L001_R2_001.fastq	BT073542E8	T0	Abdomen	2016-11-01	7354200000000	Sparus_aurata	UV	Died_d4	Died	L16		1st	7321	7239
S14_BT072DA4A4_S14	S14_BT072DA4A4_S14_L001_R1_001.fastq	S14_BT072DA4A4_S14_L001_R2_001.fastq	BT072DA4A4	T0	Abdomen	2016-11-01	72DA4A4	Sparus_aurata	UV	Died_d4	Died	L16		1st	29570	29570
S19_BT072D4B18_S19	S19_BT072D4B18_S19_L001_R1_001.fastq	S19_BT072D4B18_S19_L001_R2_001.fastq	BT072D4B18	T0	Abdomen	2016-11-01	72D4B18	Sparus_aurata	UV	Died_d4	Died	L16		1st	11745	11745
S24_BT072D2650_S24	S24_BT072D2650_S24_L001_R1_001.fastq	S24_BT072D2650_S24_L001_R2_001.fastq	BT072D2650	T0	Abdomen	2016-11-01	72D2650	Sparus_aurata	UV	Died_d4	Died	L16		1st	10265	10165
S29_BT072D9213_S29	S29_BT072D9213_S29_L001_R1_001.fastq	S29_BT072D9213_S29_L001_R2_001.fastq	BT072D9213	T0	Abdomen	2016-11-01	72D9213	Sparus_aurata	UV	Died_d4	Died	L16		1st	50496	50496
S34_BT072D9BFA_S34	S34_BT072D9BFA_S34_L001_R1_001.fastq	S34_BT072D9BFA_S34_L001_R2_001.fastq	BT072D9BFA	T0	Abdomen	2016-11-01	72D9BFA	Sparus_aurata	UV	Died_d4	Died	L16		1st	12667	12667
S45_BT173542E8_S45	S45_BT173542E8_S45_L001_R1_001.fastq	S45_BT173542E8_S45_L001_R2_001.fastq	BT173542E8	T1	Abdomen	14/01/2016	7354200000000	Sparus_aurata	UV	Died_d4	Died	L16		1st	74872	74863
S50_BT172DA4A4_S50	S50_BT172DA4A4_S50_L001_R1_001.fastq	S50_BT172DA4A4_S50_L001_R2_001.fastq	BT172DA4A4	T1	Abdomen	14/01/2016	72DA4A4	Sparus_aurata	UV	Died_d4	Died	L16		1st	12117	12109
S56_BT172D4B18_S56	S56_BT172D4B18_S56_L001_R1_001.fastq	S56_BT172D4B18_S56_L001_R2_001.fastq	BT172D4B18	T1	Abdomen	14/01/2016	72D4B18	Sparus_aurata	UV	Died_d4	Died	L16		1st	23667	23647
S61_BT172D2650_S61	S61_BT172D2650_S61_L001_R1_001.fastq	S61_BT172D2650_S61_L001_R2_001.fastq	BT172D2650	T1	Abdomen	14/01/2016	72D2650	Sparus_aurata	UV	Died_d4	Died	L16		1st	124366	124321
S66_BT172D9213_S66	S66_BT172D9213_S66_L001_R1_001.fastq	S66_BT172D9213_S66_L001_R2_001.fastq	BT172D9213	T1	Abdomen	14/01/2016	72D9213	Sparus_aurata	UV	Died_d4	Died	L16		1st	82353	82327
S71_BT172D9BFA_S71	S71_BT172D9BFA_S71_L001_R1_001.fastq	S71_BT172D9BFA_S71_L001_R2_001.fastq	BT172D9BFA	T1	Abdomen	14/01/2016	72D9BFA	Sparus_aurata	UV	Died_d4	Died	L16		1st	345	337
S02_BT07352819_S02	S02_BT07352819_S02_L001_R1_001.fastq	S02_BT07352819_S02_L001_R2_001.fastq	BT07352819	T0	Abdomen	2016-04-09	7352819	Sparus_aurata	not_UV	Died_d4	Died	L17		2nd	27023	27023
S05_BT07353375_S05	S05_BT07353375_S05_L001_R1_001.fastq	S05_BT07353375_S05_L001_R2_001.fastq	BT07353375	T0	Abdomen	2016-04-09	7353375	Sparus_aurata	not_UV	Died_d4	Died	L17		2nd	12573	12568
S08_BT0736391F_S08	S08_BT0736391F_S08_L001_R1_001.fastq	S08_BT0736391F_S08_L001_R2_001.fastq	BT0736391F	T0	Abdomen	2016-04-09	736391F	Sparus_aurata	not_UV	Died_d4	Died	L17		2nd	2035	1963
S11_BT073577D5_S11	S11_BT073577D5_S11_L001_R1_001.fastq	S11_BT073577D5_S11_L001_R2_001.fastq	BT073577D5	T0	Abdomen	2016-04-09	73577D5	Sparus_aurata	not_UV	Survived	Survived	L17		2nd	117321	115470
S14_BT07358A89_S14	S14_BT07358A89_S14_L001_R1_001.fastq	S14_BT07358A89_S14_L001_R2_001.fastq	BT07358A89	T0	Abdomen	2016-04-09	7358A89	Sparus_aurata	not_UV	Died_d4	Died	L17		2nd	60898	60711
S17_BT07358E07_S17	S17_BT07358E07_S17_L001_R1_001.fastq	S17_BT07358E07_S17_L001_R2_001.fastq	BT07358E07	T0	Abdomen	2016-04-09	73580000000	Sparus_aurata	not_UV	Survived	Survived	L17		2nd	91172	91084
S20_BT0735975F_S20	S20_BT0735975F_S20_L001_R1_001.fastq	S20_BT0735975F_S20_L001_R2_001.fastq	BT0735975F	T0	Abdomen	2016-04-09	735975F	Sparus_aurata	not_UV	Died_d4	Died	L17		2nd	99234	98546
S23_BT073599C3_S23	S23_BT073599C3_S23_L001_R1_001.fastq	S23_BT073599C3_S23_L001_R2_001.fastq	BT073599C3	T0	Abdomen	2016-04-09	73599C3	Sparus_aurata	not_UV	Survived	Survived	L17		2nd	11496	11462
S26_BT0735B506_S26	S26_BT0735B506_S26_L001_R1_001.fastq	S26_BT0735B506_S26_L001_R2_001.fastq	BT0735B506	T0	Abdomen	2016-04-09	735B506	Sparus_aurata	not_UV	Died_d4	Died	L17		2nd	1161	1121
S30_BT0735B618_S30	S30_BT0735B618_S30_L001_R1_001.fastq	S30_BT0735B618_S30_L001_R2_001.fastq	BT0735B618	T0	Abdomen	2016-04-09	735B618	Sparus_aurata	not_UV	Survived	Survived	L17		2nd	537	537
S35_BT17352819_S35	S35_BT17352819_S35_L001_R1_001.fastq	S35_BT17352819_S35_L001_R2_001.fastq	BT17352819	T1	Abdomen	2016-07-09	7352819	Sparus_aurata	not_UV	Died_d4	Died	L17		2nd	10634	10630
S38_BT17353375_S38	S38_BT17353375_S38_L001_R1_001.fastq	S38_BT17353375_S38_L001_R2_001.fastq	BT17353375	T1	Abdomen	2016-07-09	7353375	Sparus_aurata	not_UV	Died_d4	Died	L17		2nd	100924	98221
S41_BT1736391F_S41	S41_BT1736391F_S41_L001_R1_001.fastq	S41_BT1736391F_S41_L001_R2_001.fastq	BT1736391F	T1	Abdomen	2016-07-09	736391F	Sparus_aurata	not_UV	Died_d4	Died	L17		2nd	25482	25423
S44_BT173577D5_S44	S44_BT173577D5_S44_L001_R1_001.fastq	S44_BT173577D5_S44_L001_R2_001.fastq	BT173577D5	T1	Abdomen	2016-07-09	73577D5	Sparus_aurata	not_UV	Survived	Survived	L17		2nd	162771	162457
S47_BT17358A89_S47	S47_BT17358A89_S47_L001_R1_001.fastq	S47_BT17358A89_S47_L001_R2_001.fastq	BT17358A89	T1	Abdomen	2016-07-09	7358A89	Sparus_aurata	not_UV	Died_d4	Died	L17		2nd	55731	55678
S50_BT17358E07_S50	S50_BT17358E07_S50_L001_R1_001.fastq	S50_BT17358E07_S50_L001_R2_001.fastq	BT17358E07	T1	Abdomen	2016-07-09	73580000000	Sparus_aurata	not_UV	Survived	Survived	L17		2nd	95171	95125
S53_BT1735975F_S53	S53_BT1735975F_S53_L001_R1_001.fastq	S53_BT1735975F_S53_L001_R2_001.fastq	BT1735975F	T1	Abdomen	2016-07-09	735975F	Sparus_aurata	not_UV	Died_d4	Died	L17		2nd	109981	109975
S56_BT173599C3_S56	S56_BT173599C3_S56_L001_R1_001.fastq	S56_BT173599C3_S56_L001_R2_001.fastq	BT173599C3	T1	Abdomen	2016-07-09	73599C3	Sparus_aurata	not_UV	Survived	Survived	L17		2nd	9881	9673
S59_BT1735B506_S59	S59_BT1735B506_S59_L001_R1_001.fastq	S59_BT1735B506_S59_L001_R2_001.fastq	BT1735B506	T1	Abdomen	2016-07-09	735B506	Sparus_aurata	not_UV	Died_d4	Died	L17		2nd	69438	67188
S62_BT1735B618_S62	S62_BT1735B618_S62_L001_R1_001.fastq	S62_BT1735B618_S62_L001_R2_001.fastq	BT1735B618	T1	Abdomen	2016-07-09	735B618	Sparus_aurata	not_UV	Survived	Survived	L17		2nd	1457	1457
S66_BT273577D5_S66	S66_BT273577D5_S66_L001_R1_001.fastq	S66_BT273577D5_S66_L001_R2_001.fastq	BT273577D5	T2	Abdomen	13/09/2016	73577D5	Sparus_aurata	not_UV	Survived	Survived	L17		2nd	29022	28783
S69_BT27358E07_S69	S69_BT27358E07_S69_L001_R1_001.fastq	S69_BT27358E07_S69_L001_R2_001.fastq	BT27358E07	T2	Abdomen	13/09/2016	73580000000	Sparus_aurata	not_UV	Survived	Survived	L17		2nd	187569	187569
S73_BT273599C3_S73	S73_BT273599C3_S73_L001_R1_001.fastq	S73_BT273599C3_S73_L001_R2_001.fastq	BT273599C3	T2	Abdomen	13/09/2016	73599C3	Sparus_aurata	not_UV	Survived	Survived	L17		2nd	6004	6004
S76_BT2735B618_S76	S76_BT2735B618_S76_L001_R1_001.fastq	S76_BT2735B618_S76_L001_R2_001.fastq	BT2735B618	T2	Abdomen	13/09/2016	735B618	Sparus_aurata	not_UV	Survived	Survived	L17		2nd	18773	18728
S80_BT373577D5_S80	S80_BT373577D5_S80_L001_R1_001.fastq	S80_BT373577D5_S80_L001_R2_001.fastq	BT373577D5	T3	Abdomen	27/09/2016	73577D5	Sparus_aurata	not_UV	Survived	Survived	L17		2nd	24422	24342
S83_BT37358E07_S83	S83_BT37358E07_S83_L001_R1_001.fastq	S83_BT37358E07_S83_L001_R2_001.fastq	BT37358E07	T3	Abdomen	27/09/2016	73580000000	Sparus_aurata	not_UV	Survived	Survived	L17		2nd	24944	24944
S86_BT373599C3_S86	S86_BT373599C3_S86_L001_R1_001.fastq	S86_BT373599C3_S86_L001_R2_001.fastq	BT373599C3	T3	Abdomen	27/09/2016	73599C3	Sparus_aurata	not_UV	Survived	Survived	L17		2nd	8586	8560
S89_BT3735B618_S89	S89_BT3735B618_S89_L001_R1_001.fastq	S89_BT3735B618_S89_L001_R2_001.fastq	BT3735B618	T3	Abdomen	27/09/2016	735B618	Sparus_aurata	not_UV	Survived	Survived	L17		2nd	29161	28990
S01_GT07352819_S01	S01_GT07352819_S01_L001_R1_001.fastq	S01_GT07352819_S01_L001_R2_001.fastq	GT07352819	T0	Gills	2016-04-09	7352819	Sparus_aurata	not_UV	Died_d4	Died	L17		2nd	23644	23644
S04_GT07353375_S04	S04_GT07353375_S04_L001_R1_001.fastq	S04_GT07353375_S04_L001_R2_001.fastq	GT07353375	T0	Gills	2016-04-09	7353375	Sparus_aurata	not_UV	Died_d4	Died	L17		2nd	67936	67844
S16_GT07358E07_S16	S16_GT07358E07_S16_L001_R1_001.fastq	S16_GT07358E07_S16_L001_R2_001.fastq	GT07358E07	T0	Gills	2016-04-09	73580000000	Sparus_aurata	not_UV	Survived	Survived	L17		2nd	217655	215934
S10_GT073577D5_S10	S10_GT073577D5_S10_L001_R1_001.fastq	S10_GT073577D5_S10_L001_R2_001.fastq	GT073577D5	T0	Gills	2016-04-09	73577D5	Sparus_aurata	not_UV	Survived	Survived	L17		2nd	140304	138049
S13_GT07358A89_S13	S13_GT07358A89_S13_L001_R1_001.fastq	S13_GT07358A89_S13_L001_R2_001.fastq	GT07358A89	T0	Gills	2016-04-09	7358A89	Sparus_aurata	not_UV	Died_d4	Died	L17		2nd	113714	113424
S19_GT0735975F_S19	S19_GT0735975F_S19_L001_R1_001.fastq	S19_GT0735975F_S19_L001_R2_001.fastq	GT0735975F	T0	Gills	2016-04-09	735975F	Sparus_aurata	not_UV	Died_d4	Died	L17		2nd	162263	152791
S40_31T1FG_S40	S40_31T1FG_S40_L001_R1_001.fastq	S40_31T1FG_S40_L001_R2_001.fastq	31T1FG	T1	Gills	14/01/2016	72DBD13	Sparus_aurata	not_UV	Survived	Survived	L08		1st	11022	10465
S45_33T1FG_S45	S45_33T1FG_S45_L001_R1_001.fastq	S45_33T1FG_S45_L001_R2_001.fastq	33T1FG	T1	Gills	14/01/2016	72DBF75	Sparus_aurata	not_UV	Died_d4	Died	L08		1st	5915	5894
S50_23T1FG_S50	S50_23T1FG_S50_L001_R1_001.fastq	S50_23T1FG_S50_L001_R2_001.fastq	23T1FG	T1	Gills	14/01/2016	72D3421	Sparus_aurata	not_UV	Died_d4	Died	L08		1st	1121	1097
S55_26T1FG_S55	S55_26T1FG_S55_L001_R1_001.fastq	S55_26T1FG_S55_L001_R2_001.fastq	26T1FG	T1	Gills	14/01/2016	72DD897	Sparus_aurata	not_UV	Died_d4	Died	L08		1st	5033	5015
S60_28T1FG_S60	S60_28T1FG_S60_L001_R1_001.fastq	S60_28T1FG_S60_L001_R2_001.fastq	28T1FG	T1	Gills	14/01/2016	72D1B81	Sparus_aurata	not_UV	Survived	Survived	L08		1st	6095	5851
S65_35T1FG_S65	S65_35T1FG_S65_L001_R1_001.fastq	S65_35T1FG_S65_L001_R2_001.fastq	35T1FG	T1	Gills	14/01/2016	72DB0D6	Sparus_aurata	not_UV	Died_d4	Died	L08		1st	24778	24569
S70_20T1FG_S70	S70_20T1FG_S70_L001_R1_001.fastq	S70_20T1FG_S70_L001_R2_001.fastq	20T1FG	T1	Gills	14/01/2016	72D4610	Sparus_aurata	not_UV	Died_d3	Died	L08		1st	5367	5322
S77_31T2FG_S77	S77_31T2FG_S77_L001_R1_001.fastq	S77_31T2FG_S77_L001_R2_001.fastq	31T2FG	T2	Gills	18/01/2016	72DBD13	Sparus_aurata	not_UV	Survived	Survived	L08		1st	13157	13103
S22_GT073599C3_S22	S22_GT073599C3_S22_L001_R1_001.fastq	S22_GT073599C3_S22_L001_R2_001.fastq	GT073599C3	T0	Gills	2016-04-09	73599C3	Sparus_aurata	not_UV	Survived	Survived	L17		2nd	73662	73422
S25_GT0735B506_S25	S25_GT0735B506_S25_L001_R1_001.fastq	S25_GT0735B506_S25_L001_R2_001.fastq	GT0735B506	T0	Gills	2016-04-09	735B506	Sparus_aurata	not_UV	Died_d4	Died	L17		2nd	8963	8963
S82_28T2FG_S82	S82_28T2FG_S82_L001_R1_001.fastq	S82_28T2FG_S82_L001_R2_001.fastq	28T2FG	T2	Gills	18/01/2016	72D1B81	Sparus_aurata	not_UV	Survived	Survived	L08		1st	384	374
S82_36T1FG_S82	S82_36T1FG_S82_L001_R1_001.fastq	S82_36T1FG_S82_L001_R2_001.fastq	36T1FG	T1	Gills	14/01/2016	72D3700	Sparus_aurata	not_UV	Died_d4	Died	L16		1st	115967	115876
S88_31T3FG_S88	S88_31T3FG_S88_L001_R1_001.fastq	S88_31T3FG_S88_L001_R2_001.fastq	31T3FG	T3	Gills	27/01/2016	72DBD13	Sparus_aurata	not_UV	Survived	Survived	L08		1st	3161	3037
S89_31T02FG_S89	S89_31T02FG_S89_L001_R1_001.fastq	S89_31T02FG_S89_L001_R2_001.fastq	31T02FG	T2	Gills	18/01/2016	72DBD13	Sparus_aurata	not_UV	Survived	Survived	L16		1st	42085	41881
S93_28T3FG_S93	S93_28T3FG_S93_L001_R1_001.fastq	S93_28T3FG_S93_L001_R2_001.fastq	28T3FG	T3	Gills	27/01/2016	72D1B81	Sparus_aurata	not_UV	Survived	Survived	L08		1st	2800	2651
S29_GT0735B618_S29	S29_GT0735B618_S29_L001_R1_001.fastq	S29_GT0735B618_S29_L001_R2_001.fastq	GT0735B618	T0	Gills	2016-04-09	735B618	Sparus_aurata	not_UV	Survived	Survived	L17		2nd	52114	51938
S07_GT0736391F_S07	S07_GT0736391F_S07_L001_R1_001.fastq	S07_GT0736391F_S07_L001_R2_001.fastq	GT0736391F	T0	Gills	2016-04-09	736391F	Sparus_aurata	not_UV	Died_d4	Died	L17		2nd	8367	8254
S24_28T0FG_S24	S24_28T0FG_S24_L001_R1_001.fastq	S24_28T0FG_S24_L001_R2_001.fastq	28T0FG	T0	Gills	2016-11-01	72D1B81	Sparus_aurata	not_UV	Survived	Survived	L08		1st	1470	1394
S29_35T0FG_S29	S29_35T0FG_S29_L001_R1_001.fastq	S29_35T0FG_S29_L001_R2_001.fastq	35T0FG	T0	Gills	2016-11-01	72DB0D6	Sparus_aurata	not_UV	Died_d4	Died	L08		1st	3809	3809
S39_GT173577D5_S39	S39_GT173577D5_S39_L001_R1_001.fastq	S39_GT173577D5_S39_L001_R2_001.fastq	GT173577D5	T1	Gills	14/01/2016	73577D5	Sparus_aurata	UV	Died_d4	Died	L16		1st	3589	3589
S44_GT173542E8_S44	S44_GT173542E8_S44_L001_R1_001.fastq	S44_GT173542E8_S44_L001_R2_001.fastq	GT173542E8	T1	Gills	14/01/2016	7354200000000	Sparus_aurata	UV	Died_d4	Died	L16		1st	51412	51364
S49_GT172DA4A4_S49	S49_GT172DA4A4_S49_L001_R1_001.fastq	S49_GT172DA4A4_S49_L001_R2_001.fastq	GT172DA4A4	T1	Gills	14/01/2016	72DA4A4	Sparus_aurata	UV	Died_d4	Died	L16		1st	3148	3055
S55_GT172D4B18_S55	S55_GT172D4B18_S55_L001_R1_001.fastq	S55_GT172D4B18_S55_L001_R2_001.fastq	GT172D4B18	T1	Gills	14/01/2016	72D4B18	Sparus_aurata	UV	Died_d4	Died	L16		1st	34542	34542
S60_GT172D2650_S60	S60_GT172D2650_S60_L001_R1_001.fastq	S60_GT172D2650_S60_L001_R2_001.fastq	GT172D2650	T1	Gills	14/01/2016	72D2650	Sparus_aurata	UV	Died_d4	Died	L16		1st	42398	42398
S65_GT172D9213_S65	S65_GT172D9213_S65_L001_R1_001.fastq	S65_GT172D9213_S65_L001_R2_001.fastq	GT172D9213	T1	Gills	14/01/2016	72D9213	Sparus_aurata	UV	Died_d4	Died	L16		1st	61770	61751
S70_GT172D9BFA_S70	S70_GT172D9BFA_S70_L001_R1_001.fastq	S70_GT172D9BFA_S70_L001_R2_001.fastq	GT172D9BFA	T1	Gills	14/01/2016	72D9BFA	Sparus_aurata	UV	Died_d4	Died	L16		1st	13483	13483
S3_31T0FG_S3	S3_31T0FG_S3_L001_R1_001.fastq	S3_31T0FG_S3_L001_R2_001.fastq	31T0FG	T0	Gills	2016-11-01	72DBD13	Sparus_aurata	not_UV	Survived	Survived	L08		1st	5089	5075
S8_33T0FG_S8	S8_33T0FG_S8_L001_R1_001.fastq	S8_33T0FG_S8_L001_R2_001.fastq	33T0FG	T0	Gills	2016-11-01	72DBF75	Sparus_aurata	not_UV	Died_d4	Died	L08		1st	16708	16686
S19_26T0FG_S19	S19_26T0FG_S19_L001_R1_001.fastq	S19_26T0FG_S19_L001_R2_001.fastq	26T0FG	T0	Gills	2016-11-01	72DD897	Sparus_aurata	not_UV	Died_d4	Died	L08		1st	10221	10221
S07_GT073542E8_S07	S07_GT073542E8_S07_L001_R1_001.fastq	S07_GT073542E8_S07_L001_R2_001.fastq	GT073542E8	T0	Gills	2016-11-01	7354200000000	Sparus_aurata	UV	Died_d4	Died	L16		1st	113038	112762
S18_GT072D4B18_S18	S18_GT072D4B18_S18_L001_R1_001.fastq	S18_GT072D4B18_S18_L001_R2_001.fastq	GT072D4B18	T0	Gills	2016-11-01	72D4B18	Sparus_aurata	UV	Died_d4	Died	L16		1st	56956	56785
S28_GT072D9213_S28	S28_GT072D9213_S28_L001_R1_001.fastq	S28_GT072D9213_S28_L001_R2_001.fastq	GT072D9213	T0	Gills	2016-11-01	72D9213	Sparus_aurata	UV	Died_d4	Died	L16		1st	20549	20549
S33_GT072D9BFA_S33	S33_GT072D9BFA_S33_L001_R1_001.fastq	S33_GT072D9BFA_S33_L001_R2_001.fastq	GT072D9BFA	T0	Gills	2016-11-01	72D9BFA	Sparus_aurata	UV	Died_d4	Died	L16		1st	94795	94772
S13_GT072DA4A4_S13	S13_GT072DA4A4_S13_L001_R1_001.fastq	S13_GT072DA4A4_S13_L001_R2_001.fastq	GT072DA4A4	T0	Gills	2016-11-01	72DA4A4	Sparus_aurata	UV	Died_d4	Died	L16		1st	71661	71650
S02_GT073577D5_S02	S02_GT073577D5_S02_L001_R1_001.fastq	S02_GT073577D5_S02_L001_R2_001.fastq	GT073577D5	T0	Gills	2016-11-01	73577D5	Sparus_aurata	UV	Died_d4	Died	L16		1st	193568	193336
S34_GT17352819_S34	S34_GT17352819_S34_L001_R1_001.fastq	S34_GT17352819_S34_L001_R2_001.fastq	GT17352819	T1	Gills	2016-07-09	7352819	Sparus_aurata	not_UV	Died_d4	Died	L17		2nd	144128	144116
S37_GT17353375_S37	S37_GT17353375_S37_L001_R1_001.fastq	S37_GT17353375_S37_L001_R2_001.fastq	GT17353375	T1	Gills	2016-07-09	7353375	Sparus_aurata	not_UV	Died_d4	Died	L17		2nd	119315	119302
S40_GT1736391F_S40	S40_GT1736391F_S40_L001_R1_001.fastq	S40_GT1736391F_S40_L001_R2_001.fastq	GT1736391F	T1	Gills	2016-07-09	736391F	Sparus_aurata	not_UV	Died_d4	Died	L17		2nd	118547	118298
S43_GT173577D5_S43	S43_GT173577D5_S43_L001_R1_001.fastq	S43_GT173577D5_S43_L001_R2_001.fastq	GT173577D5	T1	Gills	2016-07-09	73577D5	Sparus_aurata	not_UV	Survived	Survived	L17		2nd	36028	35944
S46_GT17358A89_S46	S46_GT17358A89_S46_L001_R1_001.fastq	S46_GT17358A89_S46_L001_R2_001.fastq	GT17358A89	T1	Gills	2016-07-09	7358A89	Sparus_aurata	not_UV	Died_d4	Died	L17		2nd	123620	118499
S49_GT17358E07_S49	S49_GT17358E07_S49_L001_R1_001.fastq	S49_GT17358E07_S49_L001_R2_001.fastq	GT17358E07	T1	Gills	2016-07-09	73580000000	Sparus_aurata	not_UV	Survived	Survived	L17		2nd	1986	1986
S52_GT1735975F_S52	S52_GT1735975F_S52_L001_R1_001.fastq	S52_GT1735975F_S52_L001_R2_001.fastq	GT1735975F	T1	Gills	2016-07-09	735975F	Sparus_aurata	not_UV	Died_d4	Died	L17		2nd	3740	3726
S55_GT173599C3_S55	S55_GT173599C3_S55_L001_R1_001.fastq	S55_GT173599C3_S55_L001_R2_001.fastq	GT173599C3	T1	Gills	2016-07-09	73599C3	Sparus_aurata	not_UV	Survived	Survived	L17		2nd	38038	37983
S58_GT1735B506_S58	S58_GT1735B506_S58_L001_R1_001.fastq	S58_GT1735B506_S58_L001_R2_001.fastq	GT1735B506	T1	Gills	2016-07-09	735B506	Sparus_aurata	not_UV	Died_d4	Died	L17		2nd	8217	7884
S61_GT1735B618_S61	S61_GT1735B618_S61_L001_R1_001.fastq	S61_GT1735B618_S61_L001_R2_001.fastq	GT1735B618	T1	Gills	2016-07-09	735B618	Sparus_aurata	not_UV	Survived	Survived	L17		2nd	5737	5680
S65_GT273577D5_S65	S65_GT273577D5_S65_L001_R1_001.fastq	S65_GT273577D5_S65_L001_R2_001.fastq	GT273577D5	T2	Gills	13/09/2016	73577D5	Sparus_aurata	not_UV	Survived	Survived	L17		2nd	32771	30202
S68_GT27358E07_S68	S68_GT27358E07_S68_L001_R1_001.fastq	S68_GT27358E07_S68_L001_R2_001.fastq	GT27358E07	T2	Gills	13/09/2016	73580000000	Sparus_aurata	not_UV	Survived	Survived	L17		2nd	125163	124598
S72_GT273599C3_S72	S72_GT273599C3_S72_L001_R1_001.fastq	S72_GT273599C3_S72_L001_R2_001.fastq	GT273599C3	T2	Gills	13/09/2016	73599C3	Sparus_aurata	not_UV	Survived	Survived	L17		2nd	43195	43195
S75_GT2735B618_S75	S75_GT2735B618_S75_L001_R1_001.fastq	S75_GT2735B618_S75_L001_R2_001.fastq	GT2735B618	T2	Gills	13/09/2016	735B618	Sparus_aurata	not_UV	Survived	Survived	L17		2nd	112492	112017
S79_GT373577D5_S79	S79_GT373577D5_S79_L001_R1_001.fastq	S79_GT373577D5_S79_L001_R2_001.fastq	GT373577D5	T3	Gills	27/09/2016	73577D5	Sparus_aurata	not_UV	Survived	Survived	L17		2nd	114816	113169
S82_GT37358E07_S82	S82_GT37358E07_S82_L001_R1_001.fastq	S82_GT37358E07_S82_L001_R2_001.fastq	GT37358E07	T3	Gills	27/09/2016	73580000000	Sparus_aurata	not_UV	Survived	Survived	L17		2nd	25600	25600
S85_GT373599C3_S85	S85_GT373599C3_S85_L001_R1_001.fastq	S85_GT373599C3_S85_L001_R2_001.fastq	GT373599C3	T3	Gills	27/09/2016	73599C3	Sparus_aurata	not_UV	Survived	Survived	L17		2nd	40559	40522
S88_GT3735B618_S88	S88_GT3735B618_S88_L001_R1_001.fastq	S88_GT3735B618_S88_L001_R2_001.fastq	GT3735B618	T3	Gills	27/09/2016	735B618	Sparus_aurata	not_UV	Survived	Survived	L17		2nd	26115	26046
S88_28T1FL_S88	S88_28T1FL_S88_L001_R1_001.fastq	S88_28T1FL_S88_L001_R2_001.fastq	28T1FL	T1	Lateral	14/01/2016	72D1B81	Sparus_aurata	not_UV	Survived	Survived	L16	R	1st	3948	3935
S25_LT072D2650_S25	S25_LT072D2650_S25_L001_R1_001.fastq	S25_LT072D2650_S25_L001_R2_001.fastq	LT072D2650	T0	Lateral	2016-11-01	72D2650	Sparus_aurata	UV	Died_d4	Died	L16	R	1st	88370	88346
S62_28T1FL_S62	S62_28T1FL_S62_L001_R1_001.fastq	S62_28T1FL_S62_L001_R2_001.fastq	28T1FL	T1	Lateral	14/01/2016	72D1B81	Sparus_aurata	not_UV	Survived	Survived	L08	R1	1st	6622	6571
S91_LT072D2650R2_S91	S91_LT072D2650R2_S91_L001_R1_001.fastq	S91_LT072D2650R2_S91_L001_R2_001.fastq	LT072D2650	T0	Lateral	2016-11-01	72D2650	Sparus_aurata	UV	Died_d4	Died	L16	R1	1st	77755	76822
S10_33T0FL_S10	S10_33T0FL_S10_L001_R1_001.fastq	S10_33T0FL_S10_L001_R2_001.fastq	33T0FL	T0	Lateral	2016-11-01	72DBF75	Sparus_aurata	not_UV	Died_d4	Died	L08		1st	12305	12147
S16_23T0FL_S16	S16_23T0FL_S16_L001_R1_001.fastq	S16_23T0FL_S16_L001_R2_001.fastq	23T0FL	T0	Lateral	2016-11-01	72D3421	Sparus_aurata	not_UV	Died_d4	Died	L08		1st	6196	6196
S21_26T0FL_S21	S21_26T0FL_S21_L001_R1_001.fastq	S21_26T0FL_S21_L001_R2_001.fastq	26T0FL	T0	Lateral	2016-11-01	72DD897	Sparus_aurata	not_UV	Died_d4	Died	L08		1st	743	702
S26_28T0FL_S26	S26_28T0FL_S26_L001_R1_001.fastq	S26_28T0FL_S26_L001_R2_001.fastq	28T0FL	T0	Lateral	2016-11-01	72D1B81	Sparus_aurata	not_UV	Survived	Survived	L08		1st	4415	4398
S31_35T0FL_S31	S31_35T0FL_S31_L001_R1_001.fastq	S31_35T0FL_S31_L001_R2_001.fastq	35T0FL	T0	Lateral	2016-11-01	72DB0D6	Sparus_aurata	not_UV	Died_d4	Died	L08		1st	21670	21197
S36_20T0FL_S36	S36_20T0FL_S36_L001_R1_001.fastq	S36_20T0FL_S36_L001_R2_001.fastq	20T0FL	T0	Lateral	2016-11-01	72D4610	Sparus_aurata	not_UV	Died_d3	Died	L08		1st	3219	3191
S42_31T1FL_S42	S42_31T1FL_S42_L001_R1_001.fastq	S42_31T1FL_S42_L001_R2_001.fastq	31T1FL	T1	Lateral	14/01/2016	72DBD13	Sparus_aurata	not_UV	Survived	Survived	L08		1st	816	738
S47_33T1FL_S47	S47_33T1FL_S47_L001_R1_001.fastq	S47_33T1FL_S47_L001_R2_001.fastq	33T1FL	T1	Lateral	14/01/2016	72DBF75	Sparus_aurata	not_UV	Died_d4	Died	L08		1st	1834	1830
S5_31T0FL_S5	S5_31T0FL_S5_L001_R1_001.fastq	S5_31T0FL_S5_L001_R2_001.fastq	31T0FL	T0	Lateral	2016-11-01	72DBD13	Sparus_aurata	not_UV	Survived	Survived	L08		1st	11250	11250
S52_23T1FL_S52	S52_23T1FL_S52_L001_R1_001.fastq	S52_23T1FL_S52_L001_R2_001.fastq	23T1FL	T1	Lateral	14/01/2016	72D3421	Sparus_aurata	not_UV	Died_d4	Died	L08		1st	895	895
S57_26T1FL_S57	S57_26T1FL_S57_L001_R1_001.fastq	S57_26T1FL_S57_L001_R2_001.fastq	26T1FL	T1	Lateral	14/01/2016	72DD897	Sparus_aurata	not_UV	Died_d4	Died	L08		1st	7348	7294
S67_35T1FL_S67	S67_35T1FL_S67_L001_R1_001.fastq	S67_35T1FL_S67_L001_R2_001.fastq	35T1FL	T1	Lateral	14/01/2016	72DB0D6	Sparus_aurata	not_UV	Died_d4	Died	L08		1st	12524	12455
S72_20T1FL_S72	S72_20T1FL_S72_L001_R1_001.fastq	S72_20T1FL_S72_L001_R2_001.fastq	20T1FL	T1	Lateral	14/01/2016	72D4610	Sparus_aurata	not_UV	Died_d3	Died	L08		1st	518	503
S79_31T2FL_S79	S79_31T2FL_S79_L001_R1_001.fastq	S79_31T2FL_S79_L001_R2_001.fastq	31T2FL	T2	Lateral	18/01/2016	72DBD13	Sparus_aurata	not_UV	Survived	Survived	L08		1st	11218	10931
S79_36T0FL_S79	S79_36T0FL_S79_L001_R1_001.fastq	S79_36T0FL_S79_L001_R2_001.fastq	36T0FL	T2	Lateral	2016-11-01	72D3700	Sparus_aurata	not_UV	Died_d4	Died	L16		1st	72811	72002
S84_28T2FL_S84	S84_28T2FL_S84_L001_R1_001.fastq	S84_28T2FL_S84_L001_R2_001.fastq	28T2FL	T2	Lateral	18/01/2016	72D1B81	Sparus_aurata	not_UV	Survived	Survived	L08		1st	14960	14946
S84_36T1FL_S84	S84_36T1FL_S84_L001_R1_001.fastq	S84_36T1FL_S84_L001_R2_001.fastq	36T1FL	T1	Lateral	14/01/2016	72D3700	Sparus_aurata	not_UV	Died_d4	Died	L16		1st	110976	110933
S90_31T3FL_S90	S90_31T3FL_S90_L001_R1_001.fastq	S90_31T3FL_S90_L001_R2_001.fastq	31T3FL	T3	Lateral	27/01/2016	72DBD13	Sparus_aurata	not_UV	Survived	Survived	L08		1st	6464	6462
S95_28T3FL_S95	S95_28T3FL_S95_L001_R1_001.fastq	S95_28T3FL_S95_L001_R2_001.fastq	28T3FL	T3	Lateral	27/01/2016	72D1B81	Sparus_aurata	not_UV	Survived	Survived	L08		1st	106583	100434
S04_LT073577D5_S04	S04_LT073577D5_S04_L001_R1_001.fastq	S04_LT073577D5_S04_L001_R2_001.fastq	LT073577D5	T0	Lateral	2016-11-01	73577D5	Sparus_aurata	UV	Died_d4	Died	L16		1st	27922	27912
S09_LT073542E8_S09	S09_LT073542E8_S09_L001_R1_001.fastq	S09_LT073542E8_S09_L001_R2_001.fastq	LT073542E8	T0	Lateral	2016-11-01	7354200000000	Sparus_aurata	UV	Died_d4	Died	L16		1st	3470	3470
S15_LT072DA4A4_S15	S15_LT072DA4A4_S15_L001_R1_001.fastq	S15_LT072DA4A4_S15_L001_R2_001.fastq	LT072DA4A4	T0	Lateral	2016-11-01	72DA4A4	Sparus_aurata	UV	Died_d4	Died	L16		1st	38916	38755
S20_LT072D4B18_S20	S20_LT072D4B18_S20_L001_R1_001.fastq	S20_LT072D4B18_S20_L001_R2_001.fastq	LT072D4B18	T0	Lateral	2016-11-01	72D4B18	Sparus_aurata	UV	Died_d4	Died	L16		1st	40535	40526
S30_LT072D9213_S30	S30_LT072D9213_S30_L001_R1_001.fastq	S30_LT072D9213_S30_L001_R2_001.fastq	LT072D9213	T0	Lateral	2016-11-01	72D9213	Sparus_aurata	UV	Died_d4	Died	L16		1st	19744	18802
S35_LT072D9BFA_S35	S35_LT072D9BFA_S35_L001_R1_001.fastq	S35_LT072D9BFA_S35_L001_R2_001.fastq	LT072D9BFA	T0	Lateral	2016-11-01	72D9BFA	Sparus_aurata	UV	Died_d4	Died	L16		1st	71068	70942
S41_LT173577D5_S41	S41_LT173577D5_S41_L001_R1_001.fastq	S41_LT173577D5_S41_L001_R2_001.fastq	LT173577D5	T1	Lateral	14/01/2016	73577D5	Sparus_aurata	UV	Died_d4	Died	L16		1st	24071	24045
S46_LT173542E8_S46	S46_LT173542E8_S46_L001_R1_001.fastq	S46_LT173542E8_S46_L001_R2_001.fastq	LT173542E8	T1	Lateral	14/01/2016	7354200000000	Sparus_aurata	UV	Died_d4	Died	L16		1st	37326	36933
S51_LT172DA4A4_S51	S51_LT172DA4A4_S51_L001_R1_001.fastq	S51_LT172DA4A4_S51_L001_R2_001.fastq	LT172DA4A4	T1	Lateral	14/01/2016	72DA4A4	Sparus_aurata	UV	Died_d4	Died	L16		1st	44203	44148
S57_LT172D4B18_S57	S57_LT172D4B18_S57_L001_R1_001.fastq	S57_LT172D4B18_S57_L001_R2_001.fastq	LT172D4B18	T1	Lateral	14/01/2016	72D4B18	Sparus_aurata	UV	Died_d4	Died	L16		1st	98249	98165
S62_LT172D2650_S62	S62_LT172D2650_S62_L001_R1_001.fastq	S62_LT172D2650_S62_L001_R2_001.fastq	LT172D2650	T1	Lateral	14/01/2016	72D2650	Sparus_aurata	UV	Died_d4	Died	L16		1st	91971	91971
S67_LT172D9213_S67	S67_LT172D9213_S67_L001_R1_001.fastq	S67_LT172D9213_S67_L001_R2_001.fastq	LT172D9213	T1	Lateral	14/01/2016	72D9213	Sparus_aurata	UV	Died_d4	Died	L16		1st	67422	67422
S72_LT172D9BFA_S72	S72_LT172D9BFA_S72_L001_R1_001.fastq	S72_LT172D9BFA_S72_L001_R2_001.fastq	LT172D9BFA	T1	Lateral	14/01/2016	72D9BFA	Sparus_aurata	UV	Died_d4	Died	L16		1st	66085	66072
S03_LT07352819_S03	S03_LT07352819_S03_L001_R1_001.fastq	S03_LT07352819_S03_L001_R2_001.fastq	LT07352819	T0	Lateral	2016-04-09	7352819	Sparus_aurata	not_UV	Died_d4	Died	L17		2nd	153499	153254
S06_LT07353375_S06	S06_LT07353375_S06_L001_R1_001.fastq	S06_LT07353375_S06_L001_R2_001.fastq	LT07353375	T0	Lateral	2016-04-09	7353375	Sparus_aurata	not_UV	Died_d4	Died	L17		2nd	92822	91746
S09_LT0736391F_S09	S09_LT0736391F_S09_L001_R1_001.fastq	S09_LT0736391F_S09_L001_R2_001.fastq	LT0736391F	T0	Lateral	2016-04-09	736391F	Sparus_aurata	not_UV	Died_d4	Died	L17		2nd	94586	94226
S12_LT073577D5_S12	S12_LT073577D5_S12_L001_R1_001.fastq	S12_LT073577D5_S12_L001_R2_001.fastq	LT073577D5	T0	Lateral	2016-04-09	73577D5	Sparus_aurata	not_UV	Survived	Survived	L17		2nd	16329	15787
S15_LT07358A89_S15	S15_LT07358A89_S15_L001_R1_001.fastq	S15_LT07358A89_S15_L001_R2_001.fastq	LT07358A89	T0	Lateral	2016-04-09	7358A89	Sparus_aurata	not_UV	Died_d4	Died	L17		2nd	28059	27968
S18_LT07358E07_S18	S18_LT07358E07_S18_L001_R1_001.fastq	S18_LT07358E07_S18_L001_R2_001.fastq	LT07358E07	T0	Lateral	2016-04-09	73580000000	Sparus_aurata	not_UV	Survived	Survived	L17		2nd	4124	4114
S21_LT0735975F_S21	S21_LT0735975F_S21_L001_R1_001.fastq	S21_LT0735975F_S21_L001_R2_001.fastq	LT0735975F	T0	Lateral	2016-04-09	735975F	Sparus_aurata	not_UV	Died_d4	Died	L17		2nd	5398	5256
S24_LT073599C3_S24	S24_LT073599C3_S24_L001_R1_001.fastq	S24_LT073599C3_S24_L001_R2_001.fastq	LT073599C3	T0	Lateral	2016-04-09	73599C3	Sparus_aurata	not_UV	Survived	Survived	L17		2nd	72739	72453
S28_LT0735B506_S28	S28_LT0735B506_S28_L001_R1_001.fastq	S28_LT0735B506_S28_L001_R2_001.fastq	LT0735B506	T0	Lateral	2016-04-09	735B506	Sparus_aurata	not_UV	Died_d4	Died	L17		2nd	1193	1166
S31_LT0735B618_S31	S31_LT0735B618_S31_L001_R1_001.fastq	S31_LT0735B618_S31_L001_R2_001.fastq	LT0735B618	T0	Lateral	2016-04-09	735B618	Sparus_aurata	not_UV	Survived	Survived	L17		2nd	41319	41162
S36_LT17352819_S36	S36_LT17352819_S36_L001_R1_001.fastq	S36_LT17352819_S36_L001_R2_001.fastq	LT17352819	T1	Lateral	2016-07-09	7352819	Sparus_aurata	not_UV	Died_d4	Died	L17		2nd	110485	110008
S39_LT17353375_S39	S39_LT17353375_S39_L001_R1_001.fastq	S39_LT17353375_S39_L001_R2_001.fastq	LT17353375	T1	Lateral	2016-07-09	7353375	Sparus_aurata	not_UV	Died_d4	Died	L17		2nd	30738	30738
S42_LT1736391F_S42	S42_LT1736391F_S42_L001_R1_001.fastq	S42_LT1736391F_S42_L001_R2_001.fastq	LT1736391F	T1	Lateral	2016-07-09	736391F	Sparus_aurata	not_UV	Died_d4	Died	L17		2nd	16206	16175
S45_LT173577D5_S45	S45_LT173577D5_S45_L001_R1_001.fastq	S45_LT173577D5_S45_L001_R2_001.fastq	LT173577D5	T1	Lateral	2016-07-09	73577D5	Sparus_aurata	not_UV	Survived	Survived	L17		2nd	30	30
S48_LT17358A89_S48	S48_LT17358A89_S48_L001_R1_001.fastq	S48_LT17358A89_S48_L001_R2_001.fastq	LT17358A89	T1	Lateral	2016-07-09	7358A89	Sparus_aurata	not_UV	Died_d4	Died	L17		2nd	6565	6526
S51_LT17358E07_S51	S51_LT17358E07_S51_L001_R1_001.fastq	S51_LT17358E07_S51_L001_R2_001.fastq	LT17358E07	T1	Lateral	2016-07-09	73580000000	Sparus_aurata	not_UV	Survived	Survived	L17		2nd	31950	31950
S54_LT1735975F_S54	S54_LT1735975F_S54_L001_R1_001.fastq	S54_LT1735975F_S54_L001_R2_001.fastq	LT1735975F	T1	Lateral	2016-07-09	735975F	Sparus_aurata	not_UV	Died_d4	Died	L17		2nd	106241	105289
S57_LT173599C3_S57	S57_LT173599C3_S57_L001_R1_001.fastq	S57_LT173599C3_S57_L001_R2_001.fastq	LT173599C3	T1	Lateral	2016-07-09	73599C3	Sparus_aurata	not_UV	Survived	Survived	L17		2nd	46994	46649
S60_LT1735B506_S60	S60_LT1735B506_S60_L001_R1_001.fastq	S60_LT1735B506_S60_L001_R2_001.fastq	LT1735B506	T1	Lateral	2016-07-09	735B506	Sparus_aurata	not_UV	Died_d4	Died	L17		2nd	42099	36710
S63_LT1735B618_S63	S63_LT1735B618_S63_L001_R1_001.fastq	S63_LT1735B618_S63_L001_R2_001.fastq	LT1735B618	T1	Lateral	2016-07-09	735B618	Sparus_aurata	not_UV	Survived	Survived	L17		2nd	23818	23737
S67_LT273577D5_S67	S67_LT273577D5_S67_L001_R1_001.fastq	S67_LT273577D5_S67_L001_R2_001.fastq	LT273577D5	T2	Lateral	13/09/2016	73577D5	Sparus_aurata	not_UV	Survived	Survived	L17		2nd	18938	18938
S71_LT27358E07_S71	S71_LT27358E07_S71_L001_R1_001.fastq	S71_LT27358E07_S71_L001_R2_001.fastq	LT27358E07	T2	Lateral	13/09/2016	73580000000	Sparus_aurata	not_UV	Survived	Survived	L17		2nd	113427	109720
S74_LT273599C3_S74	S74_LT273599C3_S74_L001_R1_001.fastq	S74_LT273599C3_S74_L001_R2_001.fastq	LT273599C3	T2	Lateral	13/09/2016	73599C3	Sparus_aurata	not_UV	Survived	Survived	L17		2nd	37843	37263
S77_LT2735B618_S77	S77_LT2735B618_S77_L001_R1_001.fastq	S77_LT2735B618_S77_L001_R2_001.fastq	LT2735B618	T2	Lateral	13/09/2016	735B618	Sparus_aurata	not_UV	Survived	Survived	L17		2nd	21603	21595
S81_LT373577D5_S81	S81_LT373577D5_S81_L001_R1_001.fastq	S81_LT373577D5_S81_L001_R2_001.fastq	LT373577D5	T3	Lateral	27/09/2016	73577D5	Sparus_aurata	not_UV	Survived	Survived	L17		2nd	328	328
S84_LT37358E07_S84	S84_LT37358E07_S84_L001_R1_001.fastq	S84_LT37358E07_S84_L001_R2_001.fastq	LT37358E07	T3	Lateral	27/09/2016	73580000000	Sparus_aurata	not_UV	Survived	Survived	L17		2nd	19435	14230
S87_LT373599C3_S87	S87_LT373599C3_S87_L001_R1_001.fastq	S87_LT373599C3_S87_L001_R2_001.fastq	LT373599C3	T3	Lateral	27/09/2016	73599C3	Sparus_aurata	not_UV	Survived	Survived	L17		2nd	5908	5788
S90_LT3735B618_S90	S90_LT3735B618_S90_L001_R1_001.fastq	S90_LT3735B618_S90_L001_R2_001.fastq	LT3735B618	T3	Lateral	27/09/2016	735B618	Sparus_aurata	not_UV	Survived	Survived	L17		2nd	25283	25283
S54_PCR1NTC_S54	S54_PCR1NTC_S54_L001_R1_001.fastq	S54_PCR1NTC_S54_L001_R2_001.fastq	NTC		Negative_Control							L16			41013	41003
S75_PCR2NTC_S75	S75_PCR2NTC_S75_L001_R1_001.fastq	S75_PCR2NTC_S75_L001_R2_001.fastq	NTC		Negative_Control							L16			39363	39294
S94_IlluminaNTC1_S94	S94_IlluminaNTC1_S94_L001_R1_001.fastq	S94_IlluminaNTC1_S94_L001_R2_001.fastq	NTC		Negative_Control							L16			123628	123505
S95_IlluminaNTC2_S95	S95_IlluminaNTC2_S95_L001_R1_001.fastq	S95_IlluminaNTC2_S95_L001_R2_001.fastq	NTC		Negative_Control							L16			8610	8599
S96_IlluminaNTC3_S96	S96_IlluminaNTC3_S96_L001_R1_001.fastq	S96_IlluminaNTC3_S96_L001_R2_001.fastq	NTC		Negative_Control							L16			4466	4457
S1_T0FF_S1	S1_T0FF_S1_L001_R1_001.fastq	S1_T0FF_S1_L001_R2_001.fastq	T0F	T0	Water	2016-11-01	Filter	Sparus_aurata	not_UV			L08		1st	44588	44507
S38_T1FF_S38	S38_T1FF_S38_L001_R1_001.fastq	S38_T1FF_S38_L001_R2_001.fastq	T1F	T1	Water	14/01/2016	Filter	Sparus_aurata	not_UV			L08		1st	105119	103422
S75_T2FF_S75	S75_T2FF_S75_L001_R1_001.fastq	S75_T2FF_S75_L001_R2_001.fastq	T2F	T2	Water	18/01/2016	Filter	Sparus_aurata	not_UV			L08		1st	42190	42165
S86_TSFF_S86	S86_TSFF_S86_L001_R1_001.fastq	S86_TSFF_S86_L001_R2_001.fastq	TSF	Ts	Water	2016-12-01	Filter	Sparus_aurata	not_UV			L08		1st	6499	6398
S37_T0F_S37	S37_T0F_S37_L001_R1_001.fastq	S37_T0F_S37_L001_R2_001.fastq	T0F	T0	Water	2016-11-01	Filter	Sparus_aurata	UV			L16		1st	18333	18322
S74_T1F_S74	S74_T1F_S74_L001_R1_001.fastq	S74_T1F_S74_L001_R2_001.fastq	TsF	Ts	Water	2016-12-01	Filter	Sparus_aurata	UV			L16		1st	5176	5156
S32_T0F_S32	S32_T0F_S32_L001_R1_001.fastq	S32_T0F_S32_L001_R2_001.fastq	T0F	T0	Water	2016-04-09	Filter	Sparus_aurata	not_UV			L17		2nd	54689	54676
S33_TsF_S33	S33_TsF_S33_L001_R1_001.fastq	S33_TsF_S33_L001_R2_001.fastq	TsF	Ts	Water	2016-06-09	Filter	Sparus_aurata	not_UV			L17		2nd	24217	24052
S78_T2F_S78	S78_T2F_S78_L001_R1_001.fastq	S78_T2F_S78_L001_R2_001.fastq	T2F	T2	Water	13/09/2016	Filter	Sparus_aurata	not_UV			L17		2nd	22557	22325
